# Supplementary material
Source: Royal Society of Chemistry journal article supplement (doi:10.1039/d6nr00885b)
Supplement: d6nr00885b1.pdf [file d6nr00885b1.pdf]

## Supporting Information

### **Zirconium-doped precursor regulates surface-bulk structure of LiCoO<sub>2</sub> for stable 4.5 V performance**

Yuanyun Dou<sup>a</sup>, Yongchao Liu<sup>b, \*</sup>, Guoqing Shen<sup>c</sup>, Zicong Yan<sup>d</sup>, Xinju Zhan<sup>d</sup>,  
Xuyong Feng<sup>a</sup>, Hongfa Xiang<sup>a, \*</sup>

<sup>a</sup> School of Materials Science and Engineering, Anhui Provincial Key Laboratory of Advanced Functional Materials and Devices, Hefei University of Technology, Hefei, Anhui 230009, P. R. China

<sup>b</sup> School of Chemistry and Materials Engineering, Huainan Normal University, Huainan, Anhui, 232038, P. R. China

<sup>c</sup> Hefei Rongjie Metal Technology Co., Ltd., Hefei, Anhui, 238000, P. R. China

<sup>d</sup> Wuhu Etc Battery Limited, Wuhu, Anhui, 241000, P. R. China

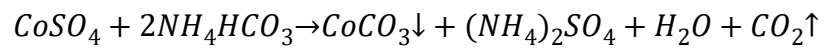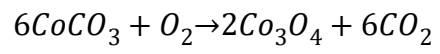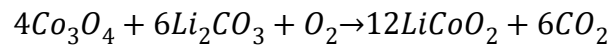

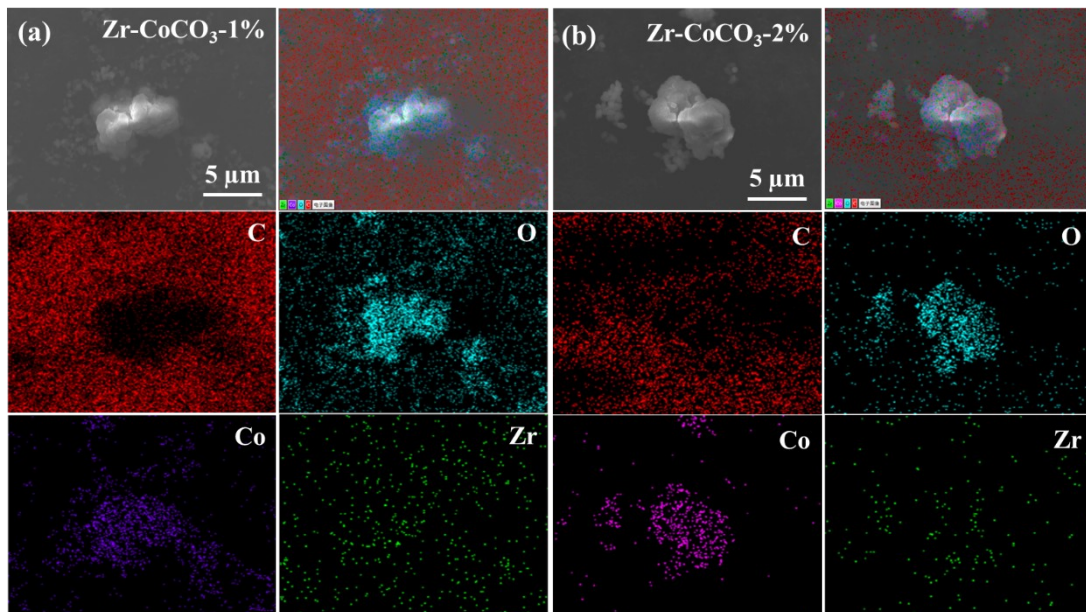

**Figure S1** EDS mapping of (a) Zr-CoCO<sub>3</sub>-1% and (b) Zr-CoCO<sub>3</sub>-2%

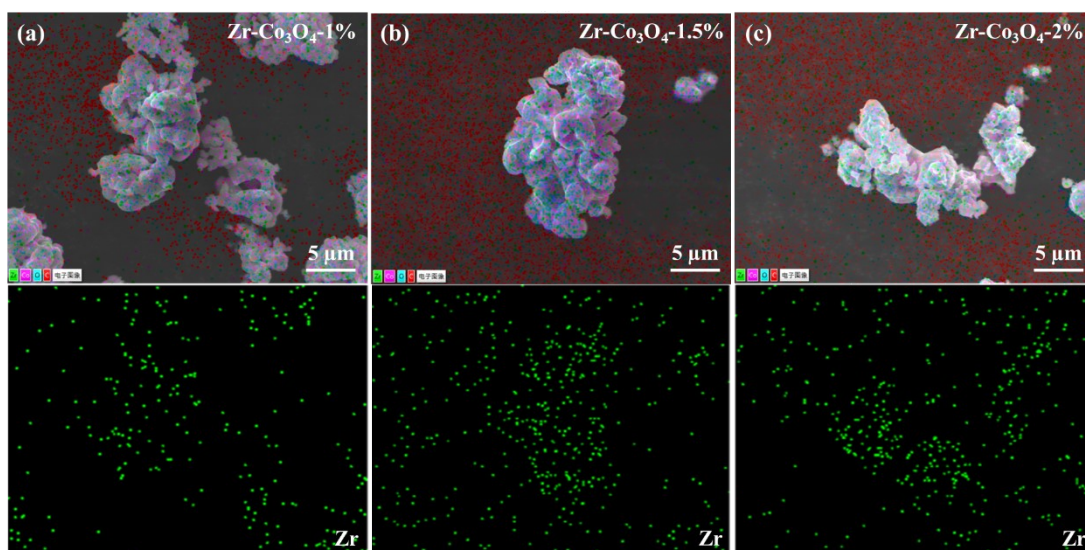

**Figure S2** EDS mapping of (a) Zr-Co<sub>3</sub>O<sub>4</sub>-1%, (b) Zr-Co<sub>3</sub>O<sub>4</sub>-1.5% and (c) Zr-Co<sub>3</sub>O<sub>4</sub>-2%

**Table S1** Tap density test data for LiCoO<sub>2</sub> and Zr-LiCoO<sub>2</sub> samples

|                    | Tap density (g cm <sup>-3</sup> ) |
|--------------------|-----------------------------------|
| LiCoO <sub>2</sub> | 2.74                              |
| Zr-LCO-1           | 2.78                              |
| Zr-LCO-2           | 2.78                              |
| Zr-LCO-3           | 2.98                              |

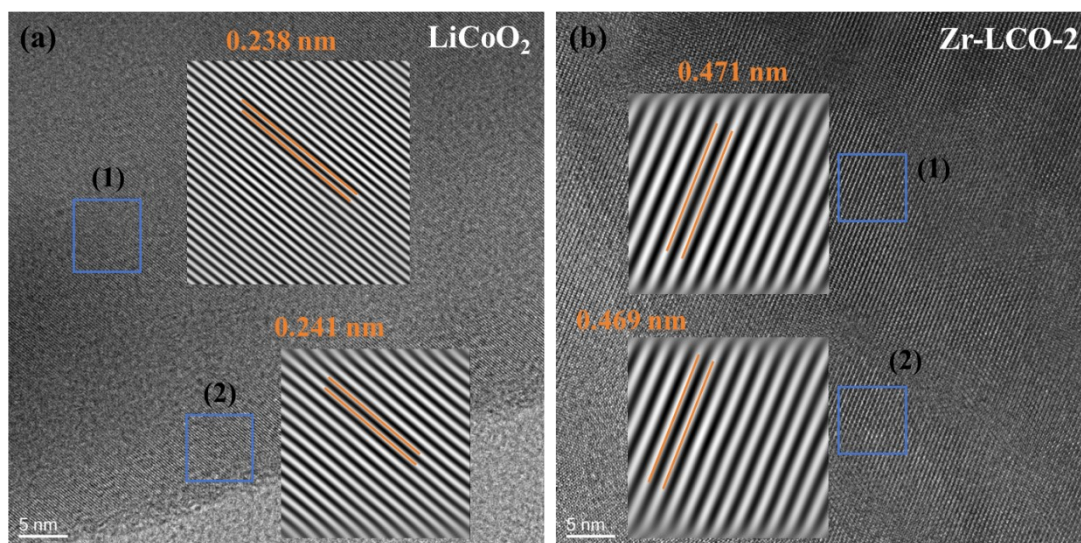

**Fig. S3** HRTEM images of (a)  $\text{LiCoO}_2$  and (b)  $\text{Zr-LCO-2}$

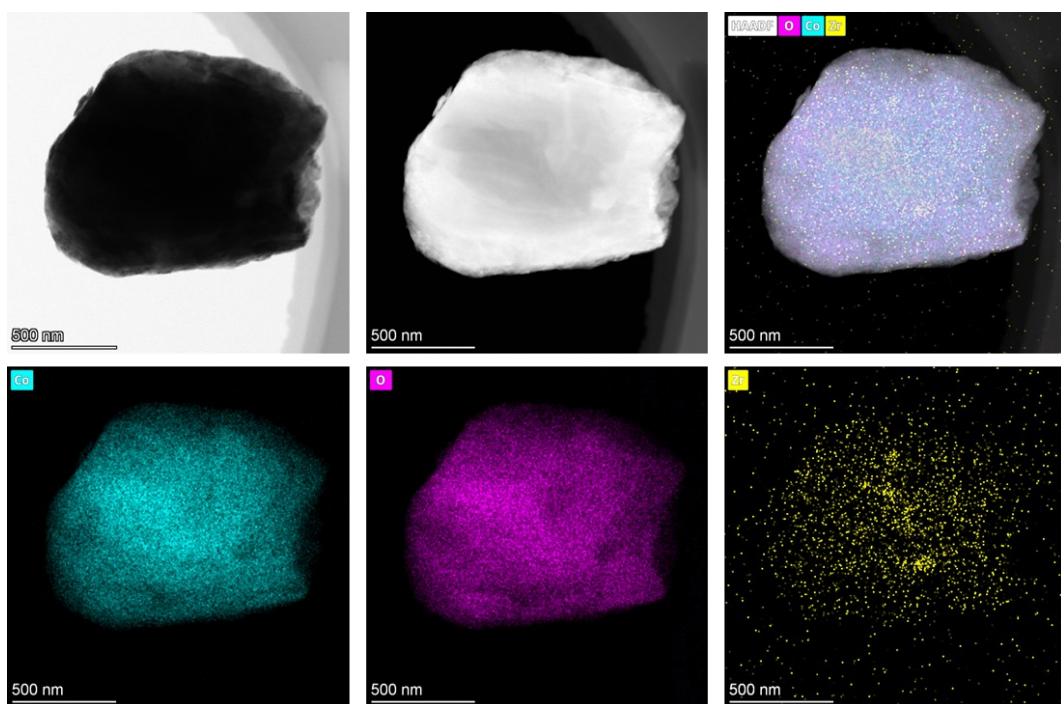

**Fig. S4** EDS mapping of Zr-LCO-2

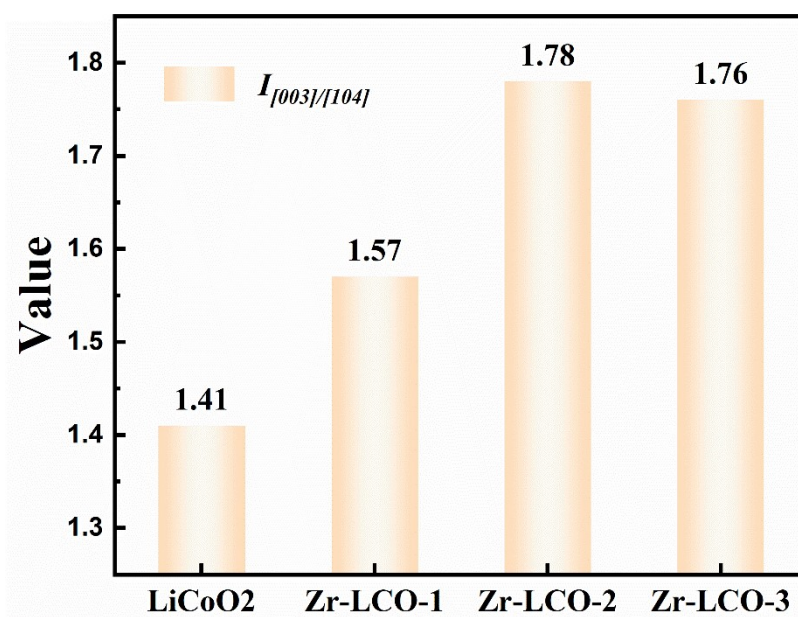

Figure S5  $I_{[003]/[104]}$  value of LiCoO<sub>2</sub> samples

**Table S2** Cell parameters of refined LiCoO<sub>2</sub> samples

| Sample             | a        | b        | c        | volume | c/a        |
|--------------------|----------|----------|----------|--------|------------|
| LiCoO <sub>2</sub> | 2.811049 | 2.811049 | 14.02094 | 95.95  | 4.98779637 |
| Zr-LCO-1           | 2.812326 | 2.812326 | 14.03545 | 96.137 | 4.99069062 |
| Zr-LCO-2           | 2.812015 | 2.812015 | 14.02883 | 96.07  | 4.98888911 |
| Zr-LCO-3           | 2.812114 | 2.812114 | 14.03132 | 96.094 | 4.98959893 |

**Table S3** Content of Co<sup>2+</sup> and Co<sup>3+</sup> in XPS test data

| Sample             | Co <sup>3+</sup> | Co <sup>2+</sup> | Co <sup>3+</sup> /Co <sup>2+</sup> |
|--------------------|------------------|------------------|------------------------------------|
| LiCoO <sub>2</sub> | 45.97%           | 54.03%           | 0.85                               |
| Zr-LCO-1           | 42.58%           | 57.42%           | 0.74                               |
| Zr-LCO-2           | 40.93%           | 59.07%           | 0.69                               |
| Zr-LCO-3           | 37.68%           | 62.32%           | 0.60                               |

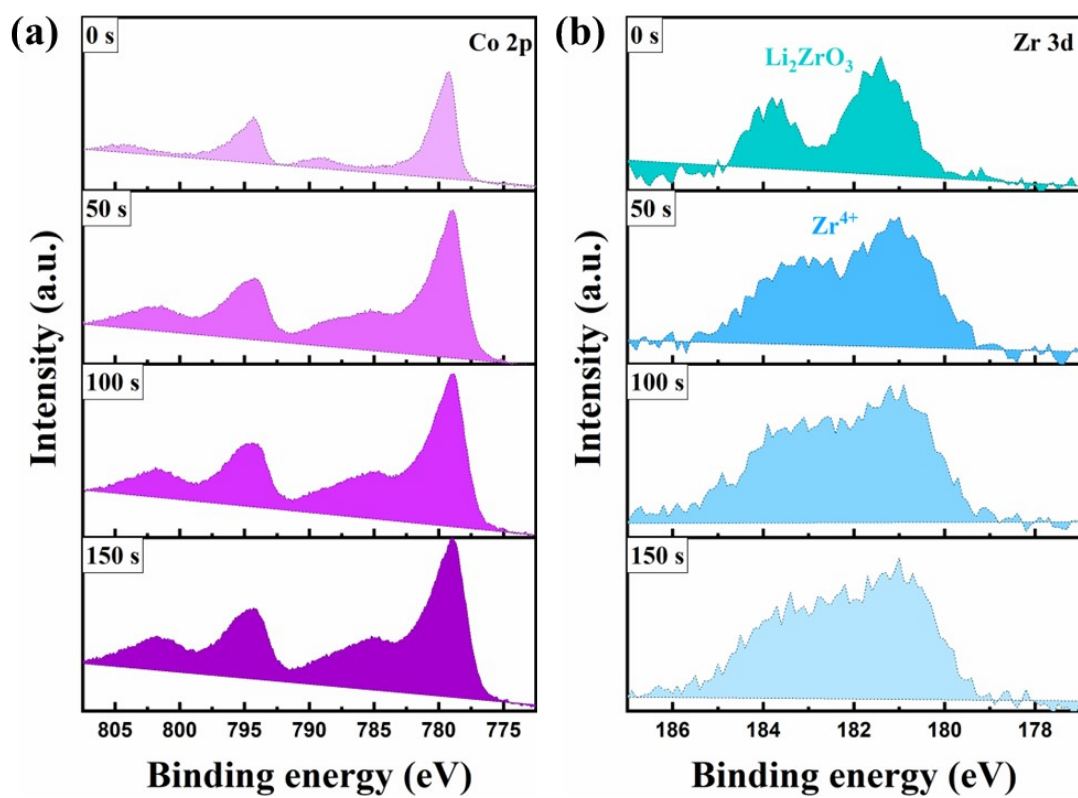

Fig. S6 (a) Co 2p and (b) Zr 3d XPS spectra of Zr-LCO-2

**Table S4** Content of O<sub>lat.</sub> and O<sub>ads.</sub> in XPS test data

| Sample             | O <sub>lat.</sub> | O <sub>ads.</sub> | O <sub>ads./O<sub>lat.</sub></sub> |
|--------------------|-------------------|-------------------|------------------------------------|
| LiCoO <sub>2</sub> | 41.03%            | 58.97%            | 1.44                               |
| Zr-LCO-1           | 27.84%            | 72.16%            | 2.59                               |
| Zr-LCO-2           | 22.52%            | 77.48%            | 3.44                               |
| Zr-LCO-3           | 19.44%            | 80.55%            | 4.14                               |

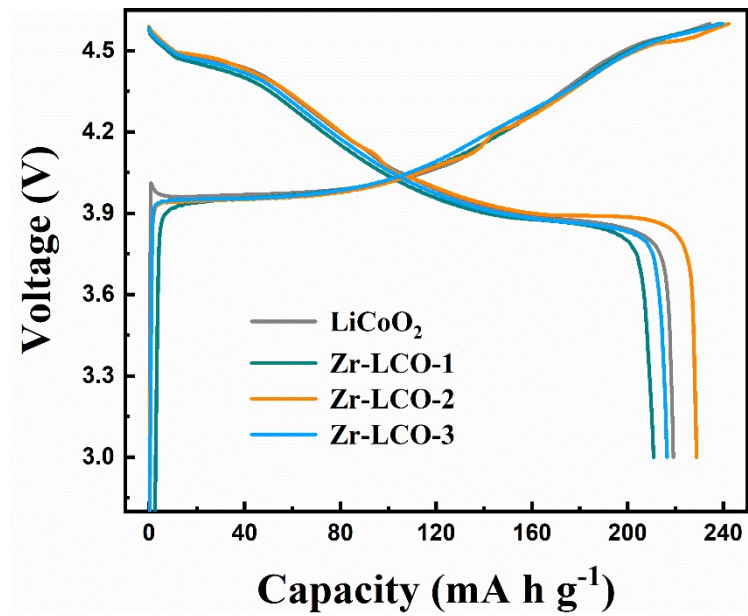

**Figure S7** Reversible Capacity of LiCoO<sub>2</sub> in the 3.0-4.6 V

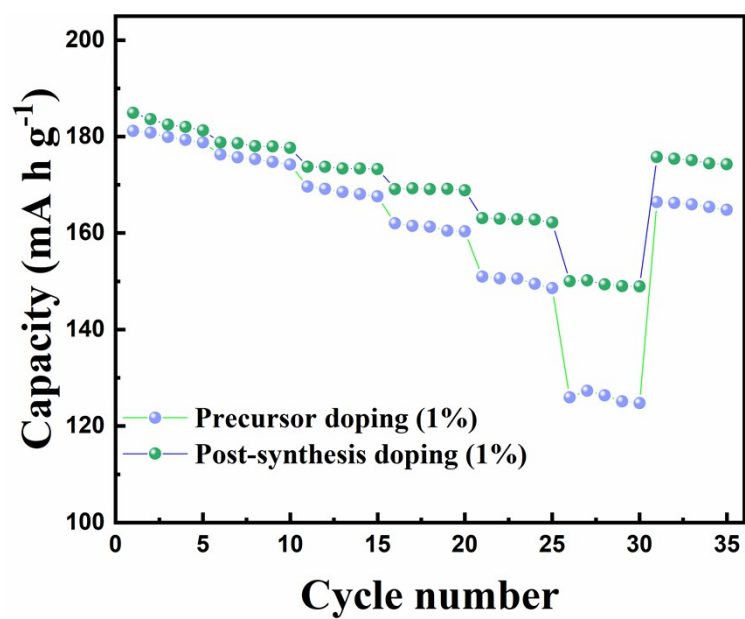

**Fig. S8** Rate performance of LiCoO<sub>2</sub> samples doped during precursor synthesis and post-synthesis

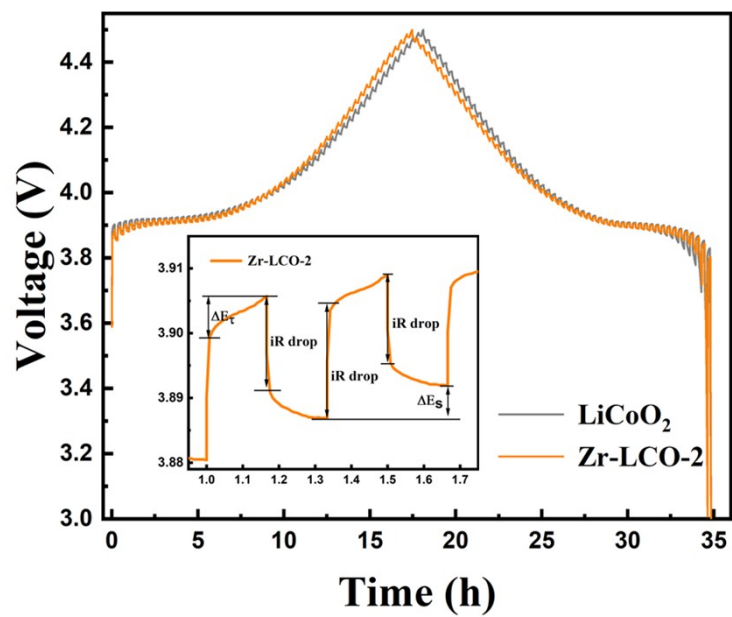

Figure S9 GITT curves of  $\text{LiCoO}_2$  and  $\text{Zr-LCO-2}$

**Table S5** ICP test data for Zr-LiCoO<sub>2</sub> samples

|          | Co    | Li   | Zr     |
|----------|-------|------|--------|
| Zr-LCO-1 | 56.84 | 7.04 | 0.3618 |
| Zr-LCO-2 | 57.64 | 6.84 | 0.6957 |
| Zr-LCO-3 | 56.82 | 7.11 | 1.1077 |
